# Supplementary material
Source: PubMed Central journal article supplement (PMC5360504)
Supplement: NIHMS849839-supplement-1.pdf [file NIHMS849839-supplement-1.pdf]

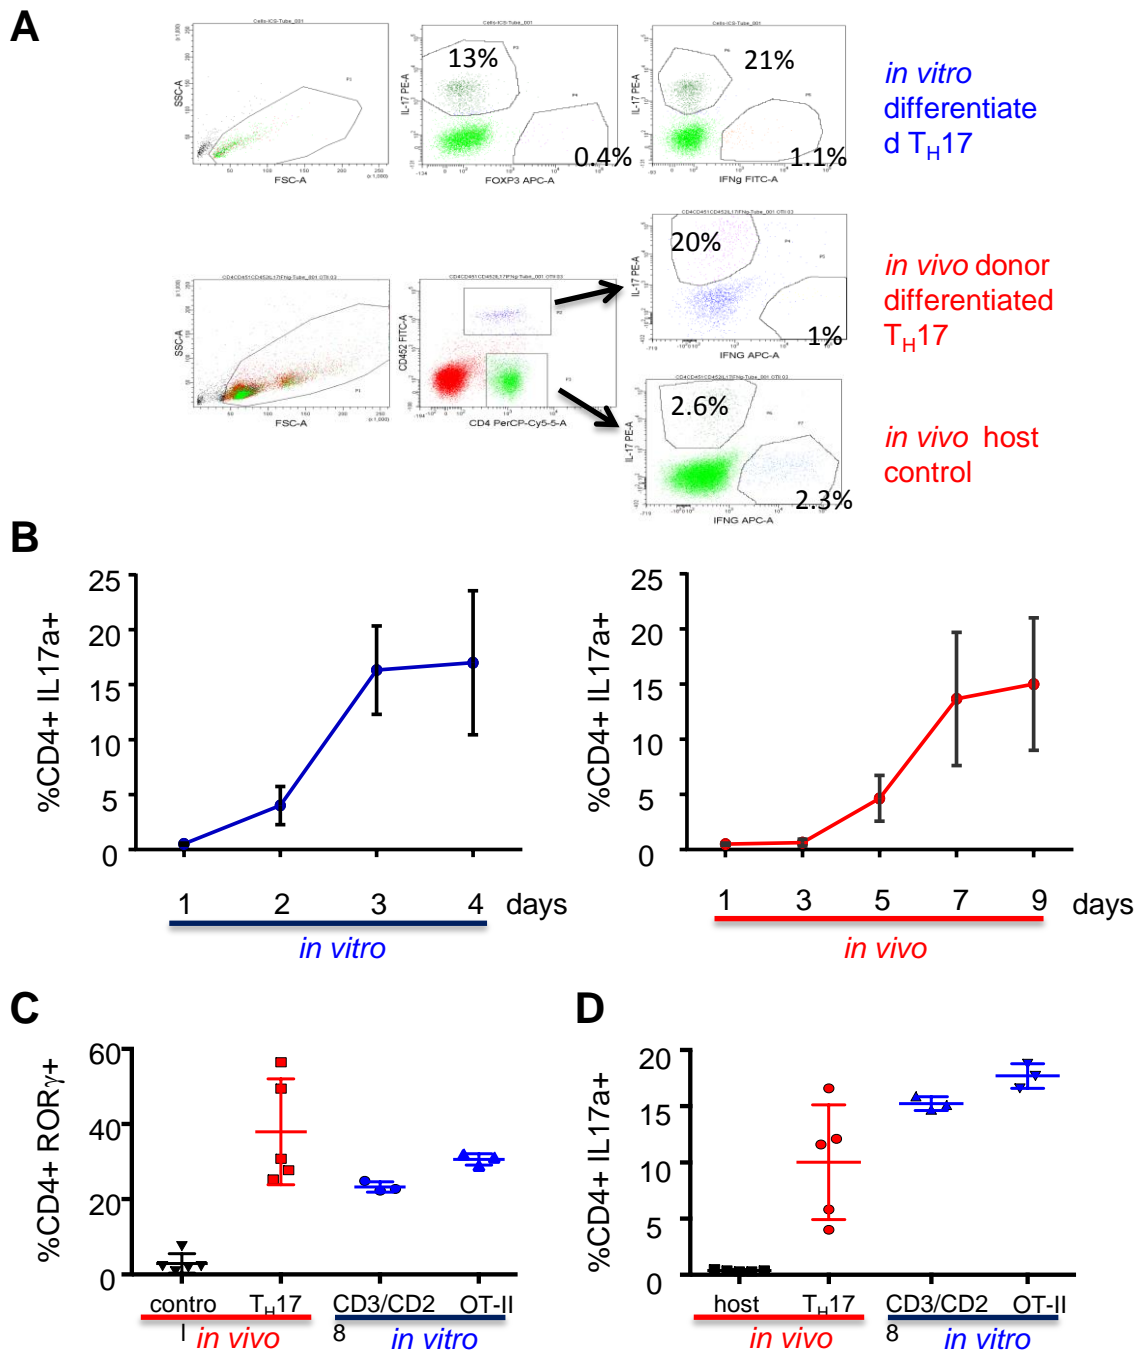

**Supplemental Figure 1. Comparable expression of ROR $\gamma$ , IL-17a and IFN $\gamma$  in in vivo and in vitro differentiated  $T_H17$**

(A) Gating strategy for FACS profile of in vitro and in vivo  $T_H17$  cells. In vitro cells were first gated on live cells then the cytokines of interest. In vivo cells were first gated on live cells, than on CD45.2+CD4+ population and then on the cytokines of interest. Representative plot analyzing the expression of IL-17a and IFN $\gamma$  in cells stimulated with PMA/Ionomycin. (B) In vivo (red) and in vitro (blue) differentiated  $T_H17$  cells were stimulated with PMA/Ionomycin at the indicated time. The percentage of CD4+IL17a+ cells was determined by FACS. (C and D) In vivo-differentiated  $T_H17$  (CD45.2+ CD4+) and in vitro cells differentiated with CD3 and CD28 or OT-II + OVA were stimulated with PMA/Ionomycin. The expression of ROR $\gamma$  and IL-17 was analyzed by FACS. Each dot represent a separate mouse (B,C) Results are representative of three independent experiments. \* $p < 0.05$  (unpaired Student's t-test) (error bars, mean  $\pm$  SEM).

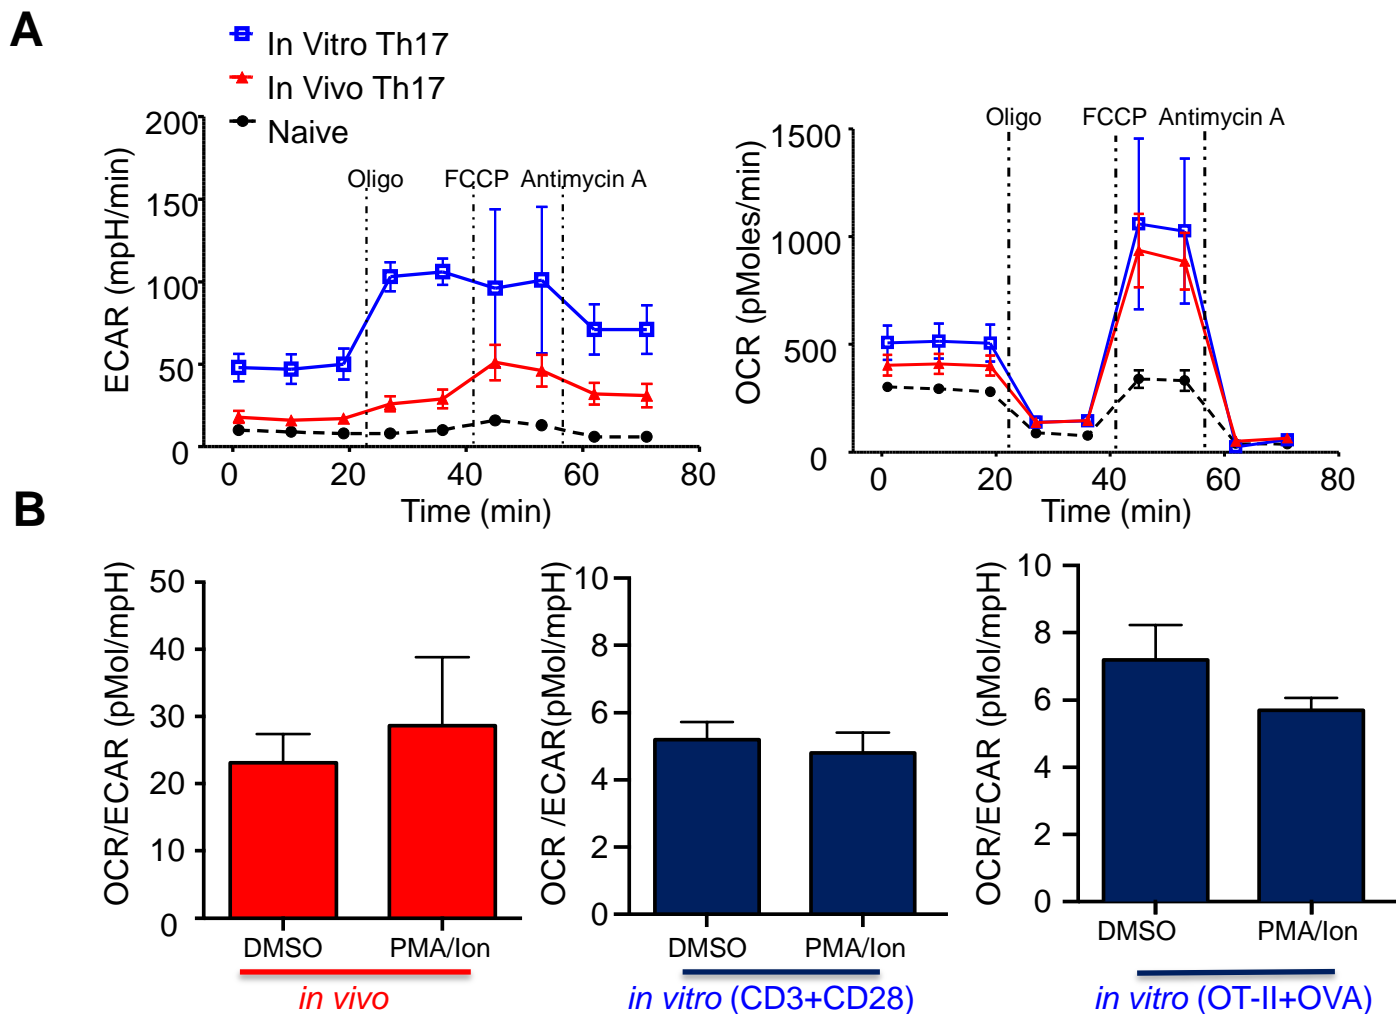

### Supplemental Figure 2. Energetic profile of *in vitro* and *in vivo* differentiated T<sub>H</sub>17

(A) Metabolic profile of naïve CD4 controls (CD4+CD62L<sup>-</sup>, oval), *in vivo* TH17 cells (CD45.2+CD4<sup>+</sup>, triangles), *in vitro* T<sub>H</sub>17 cells (CD45.1+CD4<sup>+</sup>, square) was analyzed to measure OCR and ECAR. Where indicated cells were treated with oligomycin (1 mM), FCCP (1.5 mM) and antimycin A (1 mM). (B) OCR/ECAR profile of *in vivo* differentiated T<sub>H</sub>17 (CD45.2+ CD4<sup>+</sup>), or naïve CD4 differentiated *in vitro* into T<sub>H</sub>17 by anti-CD3/anti-CD28, or OT-II splenocytes differentiated *in vitro* into T<sub>H</sub>17 by OT-II peptide stimulation, with or without PMA/Ionomycin stimulation. (A,B) Results are representative of three independent experiments. \**p* < 0.05 (unpaired Student's *t*-test) (error bars, mean ± SEM).



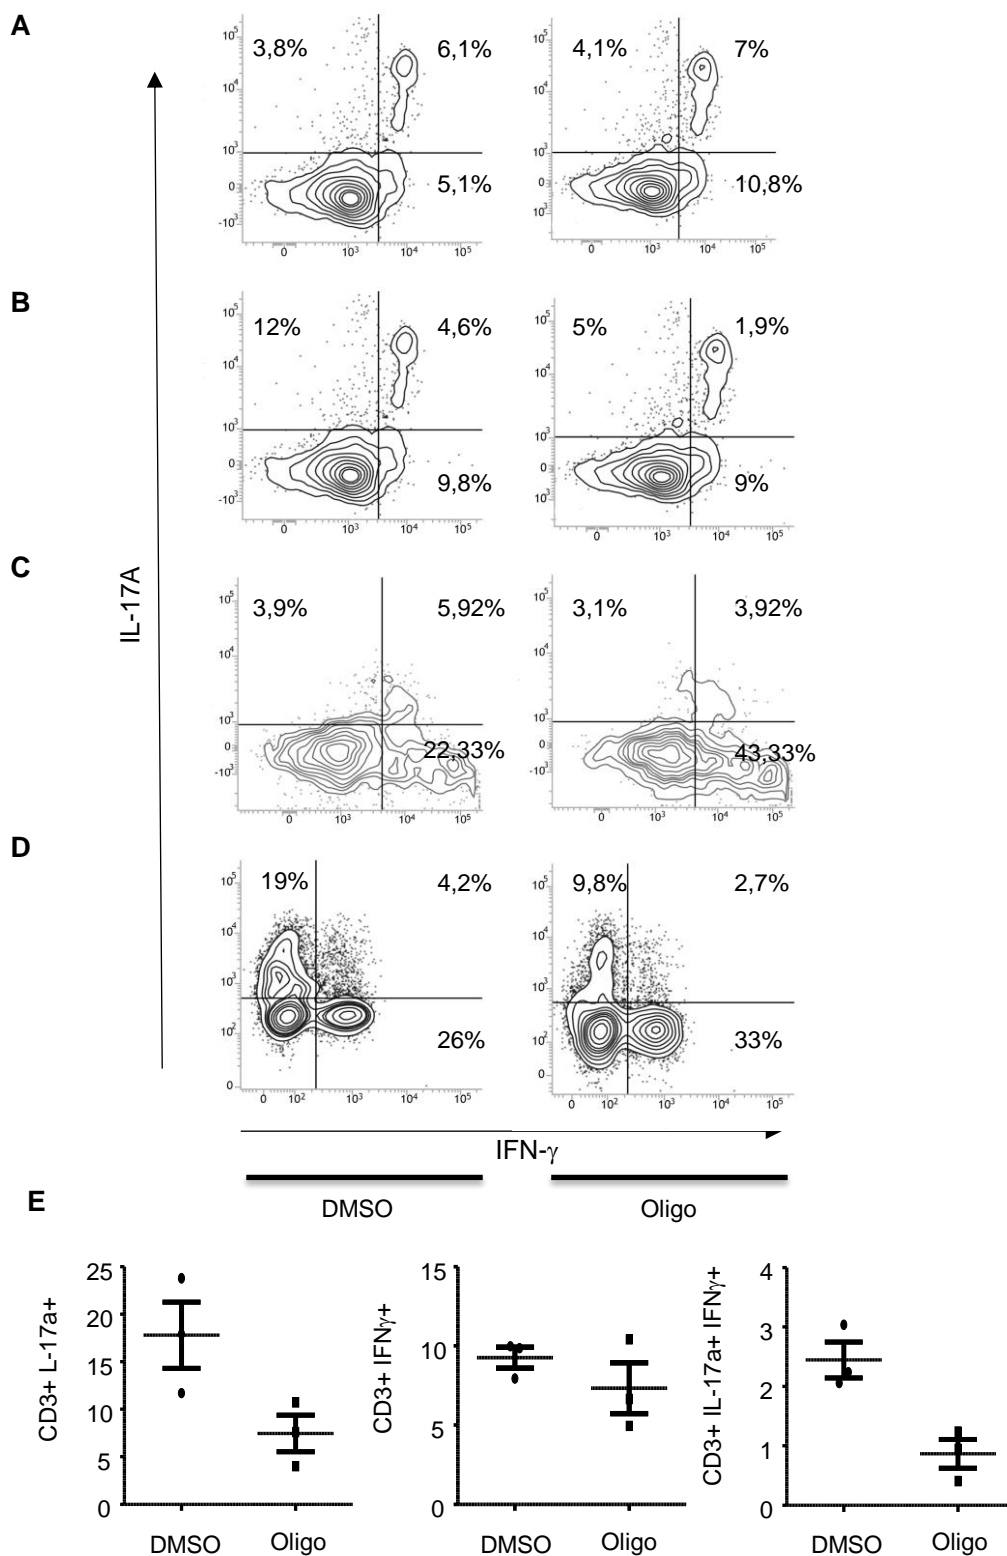

#### Supplemental Figure 4. OXPHOS controls IL-17 production in IBD.

LPMC isolated from mice treated with ethanol (A), TNBS (B and C), DSS (E), or from human IBD patients (D) were exposed for 1 h to DMSO or oligomycin (1 mM) and then stimulated with PMA/Ionomycin. (a-e) IL-17 and IFN $\gamma$  production in CD45+CD3+ (A,B,D) and CD45+CD3+CD8+ (C) was evaluated by FACS analysis. (A-D) Representative dot plot. (E) Each dot represents an individual mouse, target cell populations expressed as percentage of total CD3+ cells (E) Representative of two independent experiments \* $p < 0.05$  (paired Student's t-test) (error bars, mean  $\pm$  SEM).
